# Supplementary material for: Sociodemographic Factors Associated with Participation in Diabetes Education among Community-Dwelling Adults with Diabetes
Source: PubMed Central journal article supplement — Yonsei Med J. 2020 Jan 22;61(2):169–78. doi: 10.3349/ymj.2020.61.2.169 (PMC6992460; doi:10.3349/ymj.2020.61.2.169), 2020-01-22
Supplement: ymj-61-169-s001.pdf [file ymj-61-169-s001.pdf]

**Supplementary Table 1.** Relating Characteristics of the Study Population According to Participation in Diabetes Self-Management Education

|                                                  | <b>Non-participants</b> | <b>Participants</b> | <b>p value</b> |
|--------------------------------------------------|-------------------------|---------------------|----------------|
| Knowing HbA1c (n=23231)                          |                         |                     | <0.001         |
| Yes                                              | 3935 (23.3)             | 2489 (39.5)         |                |
| No                                               | 12988 (76.7)            | 3819 (60.5)         |                |
| Measuring HbA1c ( $\geq 2$ times/year) (n=6399)* |                         |                     | <0.001         |
| Yes                                              | 2770 (70.6)             | 1858 (75.1)         |                |
| No                                               | 1155 (29.4)             | 616 (24.9)          |                |
| Diabetic retinopathy screening (n=23365)         |                         |                     | <0.001         |
| Yes                                              | 5157 (30.3)             | 2814 (44.3)         |                |
| No                                               | 11850 (69.7)            | 3544 (55.7)         |                |
| Diabetic nephropathy screening (n=23327)         |                         |                     | <0.001         |
| Yes                                              | 5711 (33.6)             | 3116 (49.1)         |                |
| No                                               | 11270 (66.4)            | 3230 (50.9)         |                |
| Current smoking (n=23400)                        |                         |                     | 0.686          |
| Yes                                              | 2747 (16.1)             | 1041 (16.3)         |                |
| No                                               | 14285 (83.9)            | 5327 (83.7)         |                |
| Current drinking (n=23400)                       |                         |                     | <0.001         |
| Yes                                              | 8419 (49.4)             | 3359 (52.7)         |                |
| No                                               | 8613 (50.6)             | 3009 (47.3)         |                |
| Daily walking activity (n=23370)                 |                         |                     | <0.001         |
| $\leq 4$ days                                    | 9553 (56.1)             | 3194 (50.3)         |                |
| $\geq 5$ days                                    | 7466 (43.9)             | 3157 (49.7)         |                |
| Moderate physical activity (n=23359)             |                         |                     | <0.001         |
| $\leq 2$ days                                    | 13458 (79.1)            | 4836 (76.2)         |                |
| $\geq 3$ days                                    | 3554 (20.9)             | 1511 (23.8)         |                |

Data are presented as number (percentage).

\*n=6399 (only people who answered that they know HbA1c).
